# Supplementary material
Source: HighWire-hosted journal article supplement (https://jmg.bmj.com/content/56/5/271)
Supplement: inline-supplementary-material-1 [file inline-supplementary-material-1.xlsx]

## Sheet: Sheet1
Meiosis genes			Maternal effects
ATM			DNMT1
ATR			DPPA3
BMP15			HSF1
BMPRI			KHDC3L
BMPRII			KHDC3L
BNC1			MOEP
BRCA1			NLRP2
BRCA2			NLRP5
CDK1			NLRP7
CDK2			NPM2
CHEK1			PADI6
CHK2			TLE6
CKS1			TRIM28
CKS2			TUBB8
GJA4			ZFP36L2
GJA1			ZFP57
CPEB1
DAZL
DMC1
EMI2
ER
FIGLA
FOXL2
GDF9
H2AFX
HFM1
HOP2
HORMAD1
HORMAD2
LH
LHX8
MCM8
MCM9
MEIKIN
MEIOB
MND
MRE11
MSH4
MSH5
NBS1
NOBOX
NPPC
NPR2
PALB2
PATL2
PDE3A
PKA
PKA
PP2A
PRDM9
RAD50
RAD51
REC11
REC8
SCC3
ESP1
SET
SGO2
SGOL1
SMC1
SMC1b
SMC1b
SMC3
SOHLH2
SPO11
STAG1
STAG2
STAG3
SYC2PL
SYCE1
SYCP2
SYCP3
TP53
WEE2
SGOL2
TAF4B
CDC25a
PRKAR2B
MEI1
SPATA22
MEIOB
MOS
